# Supplementary material for: Unraveling the effect of reagent vibrational excitation on the scattering mechanism of the benchmark H + H2 → H2 + H hydrogen exchange reaction in the coupled 12E′ ground electronic manifold
Source: Royal Society of Chemistry journal article supplement (doi:10.1039/d4cp03433c), 2024-11-14
Supplement: d4cp03433c1.pdf [file d4cp03433c1.pdf]

**Electronic Supplementary Information:**

**“Unraveling the effect of reagent vibrational excitation on the scattering mechanism of the benchmark,  $\text{H} + \text{H}_2 \rightarrow \text{H}_2 + \text{H}$ , hydrogen exchange reaction on the coupled  $1^2\text{E}'$  ground electronic manifold”**

Jayakrushna Sahoo,<sup>1, a)</sup> Sugata Goswami,<sup>1, b)</sup> and S. Mahapatra<sup>1, c)</sup>

*School of Chemistry, University of Hyderabad, Hyderabad, 500 046,*

*India*

---

<sup>a)</sup>Present address: Laboratoire Univers et Particules de Montpellier, Université de Montpellier, UMR-CNRS 5299, 34095 Montpellier Cedex, France

<sup>b)</sup>Present address: Department of Chemistry, Medi-Caps University, A.B. Road, Pigdamber, Indore - 453 331 (M.P.),

India

<sup>c)</sup>Electronic mail: susanta.mahapatra@uohyd.ac.in

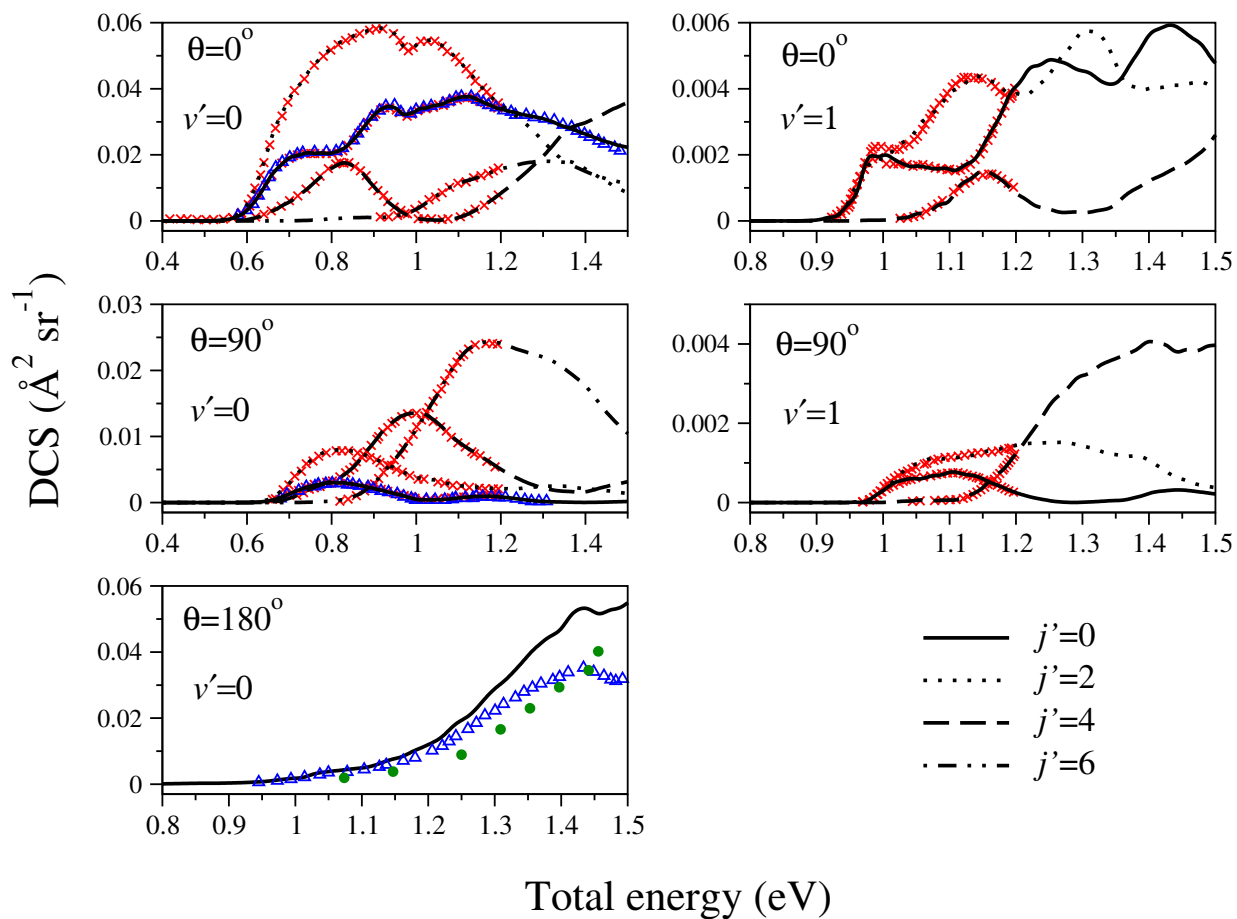

FIG. S1. Product rotational level resolved state-to-state DCSs of  $\text{H} + \text{H}_2 (v=0, j=0) \rightarrow \text{H}_2 (v'=0-1, j'=0, 2, 4, 6) + \text{H}$  reaction as a function of total energy at  $\theta = 0^\circ, 90^\circ$  and  $180^\circ$  calculated in the present work are compared with the results of Hankel *et al.*<sup>1</sup> ( $\times$ ), Althorpe<sup>2</sup> ( $\triangle$ ) and Chu *et al.*<sup>3</sup> ( $\bullet$ ). The results obtained from this work are shown by black curves of different types as indicated in the legend of the figure. The values of  $\theta$  and  $v'$  are mentioned inside each panel.

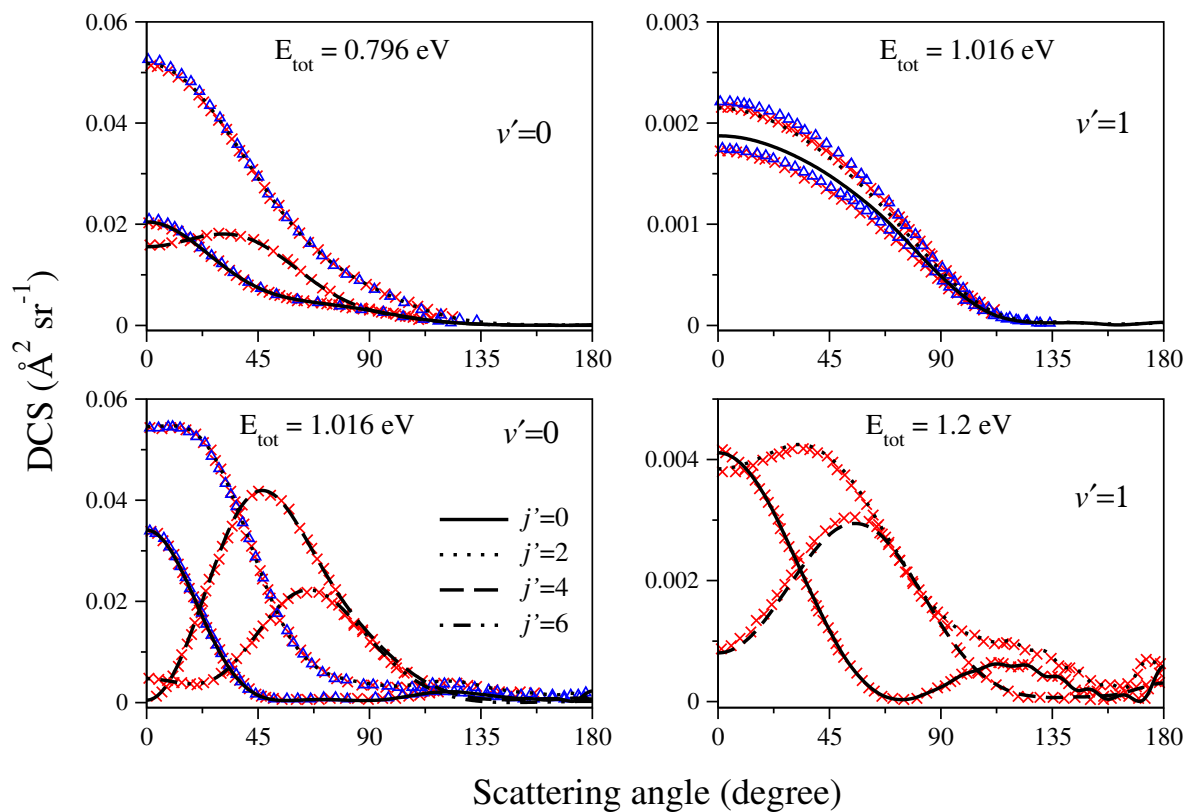

FIG. S2. Product rotational level resolved state-to-state DCSs of  $\text{H} + \text{H}_2 (v=0, j=0) \rightarrow \text{H}_2 (v'=0-1, j'=0, 2, 4, 6) + \text{H}$  reaction as a function of scattering angle at various total energies,  $E_{\text{tot}} = 0.796 \text{ eV}$ ,  $1.016 \text{ eV}$  and  $1.2 \text{ eV}$  calculated in the present work are compared with the results of Hankel *et al.*<sup>1</sup> ( $\times$ ) and Althorpe<sup>2</sup> ( $\triangle$ ). The results obtained from this work are shown by black curves of different types as indicated in the legend of the figure. The values of  $E_{\text{tot}}$  and  $v'$  are mentioned inside each panel.

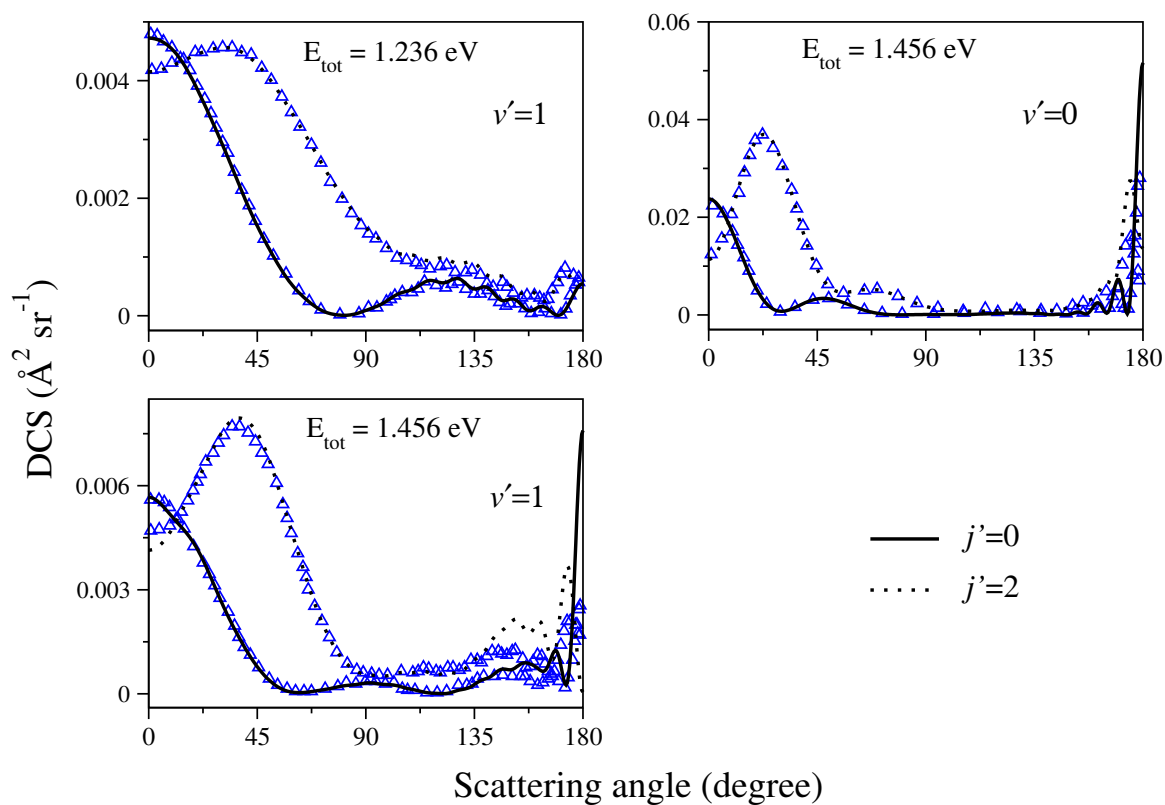

FIG. S3. Product rotational level resolved state-to-state DCSs of  $\text{H} + \text{H}_2 (v=0, j=0) \rightarrow \text{H}_2 (v'=0-1, j'=0, 2) + \text{H}$  reaction as a function of scattering angle at  $E_{\text{tot}} = 1.236 \text{ eV}$  and  $1.456 \text{ eV}$  calculated in the present work are compared with the results of Althorpe<sup>2</sup> ( $\Delta$ ). The results obtained from this work are shown by black curves of different types as indicated in the legend of the figure. The values of  $E_{\text{tot}}$  and  $v'$  are mentioned inside each panel.

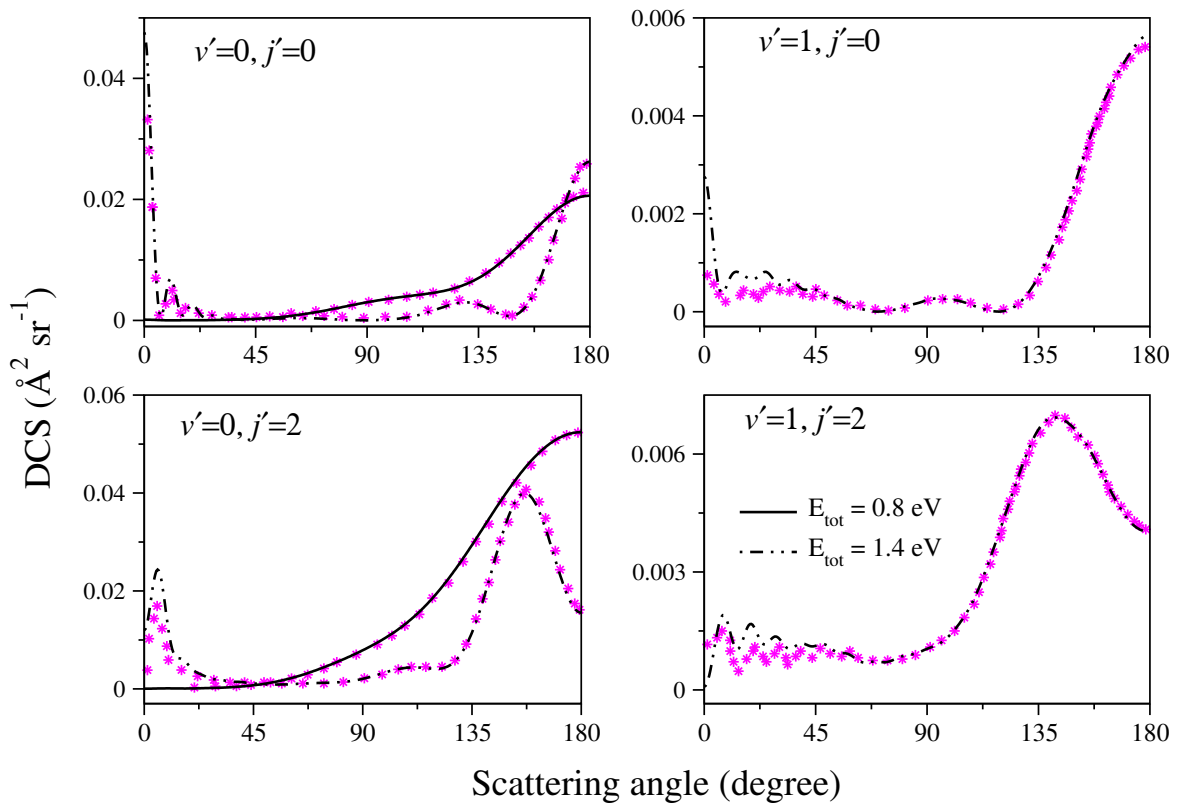

FIG. S4. Product rotational level resolved state-to-state DCSs of  $\text{H} + \text{H}_2 (v=0, j=0) \rightarrow \text{H}_2 (v'=0-1, j'=0, 2) + \text{H}$  reaction as a function of scattering angle at  $E_{\text{tot}} = 0.8 \text{ eV}$  and  $1.4 \text{ eV}$  calculated in the present work are compared with the results of Lin and Guo<sup>4</sup> (\*). The results obtained from this work are shown by black curves of different types as indicated in the legend of the figure. The values of  $v'$  and  $j'$  quantum numbers are mentioned inside each panel.

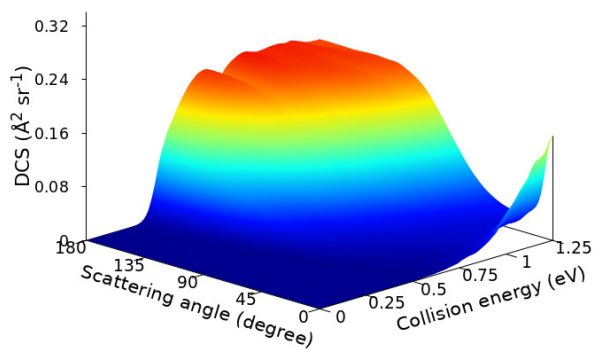

(a)  $\text{H}_2(v=0, j=0)$

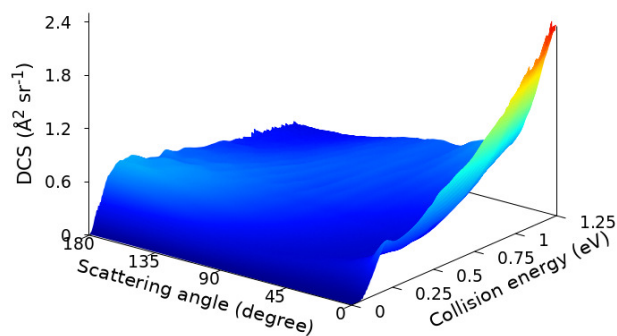

(d)  $\text{H}_2(v=3, j=0)$

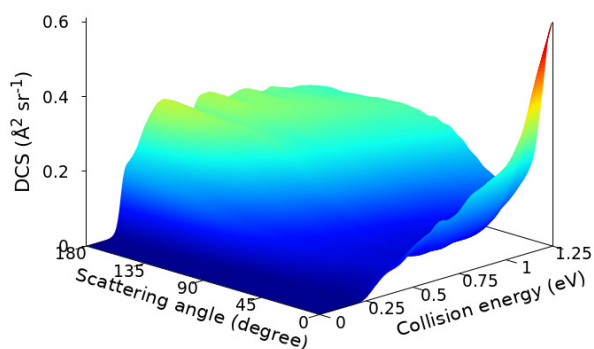

(b)  $\text{H}_2(v=1, j=0)$

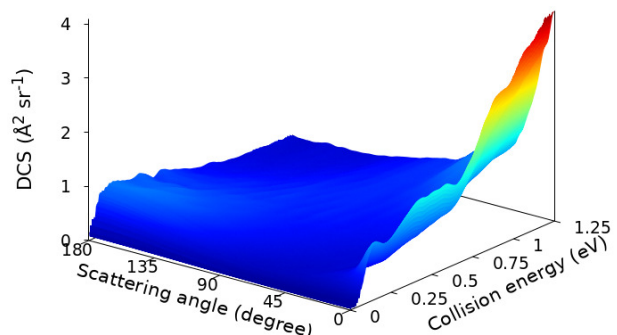

(e)  $\text{H}_2(v=4, j=0)$

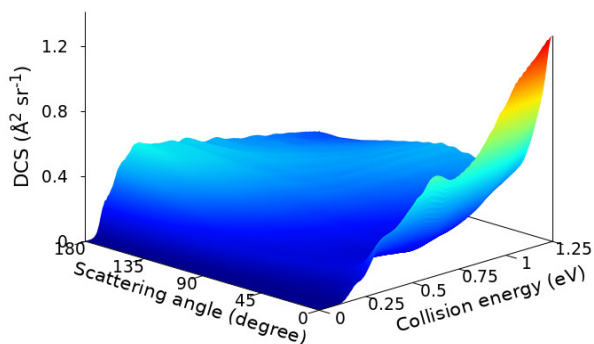

(c)  $\text{H}_2(v=2, j=0)$

FIG. S5. Three-dimensional perspective plot of initial state-selected total DCSs of the  $\text{H} + \text{H}_2(v=0-4, j=0) \rightarrow \text{H}_2(\sum v', \sum j', \sum \Omega') + \text{H}$  reaction as a function of collision energy and center-of-mass scattering angle ( $\theta$ ). The DCSs for reagent  $\text{H}_2(v=0-2, j=0)$  are obtained from uncoupled surface calculations and those for  $\text{H}_2(v=3-4, j=0)$  are obtained from coupled surface calculations.

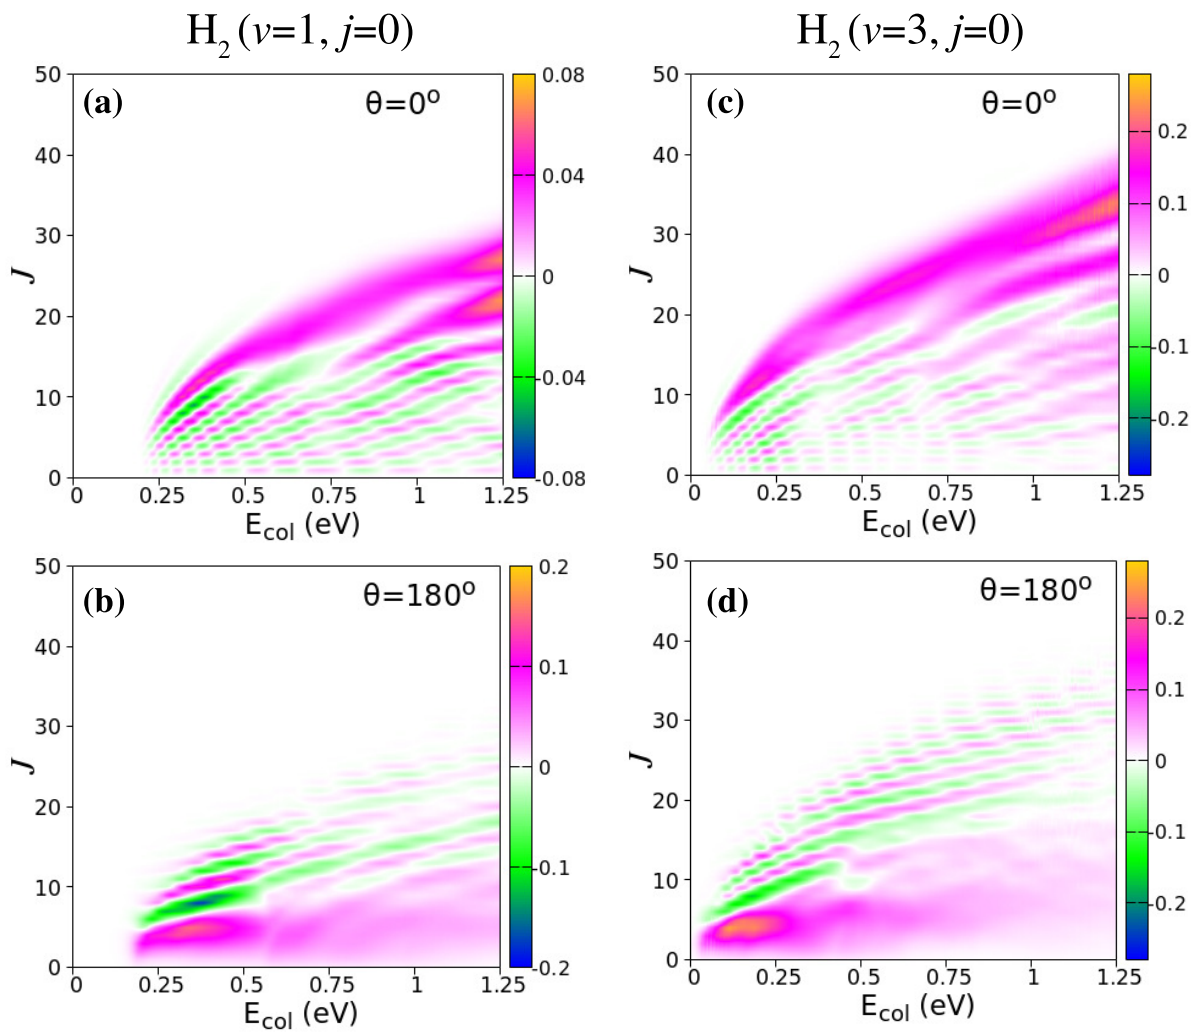

FIG. S6. Total (summed over final states)  $J$ -dependent partial DCSs ( $\text{\AA}^2 \text{sr}^{-1}$ ) of the  $\text{H} + \text{H}_2$  ( $v=1, 3, j=0$ )  $\rightarrow \text{H}_2$  ( $\sum v', \sum j', \sum \Omega'$ ) +  $\text{H}$  reaction shown as a function of  $E_{\text{col}}$  (abscissa) and  $J$  (ordinate) at  $\theta = 0^\circ$  (panels a and c) and  $180^\circ$  (panels b and d) corresponding to forward and backward scattering, respectively. The partial DCSs for reagent  $\text{H}_2$  ( $v=1, j=0$ ) are obtained from uncoupled surface calculations and that for  $\text{H}_2$  ( $v=3, j=0$ ) are obtained from coupled surface calculations.

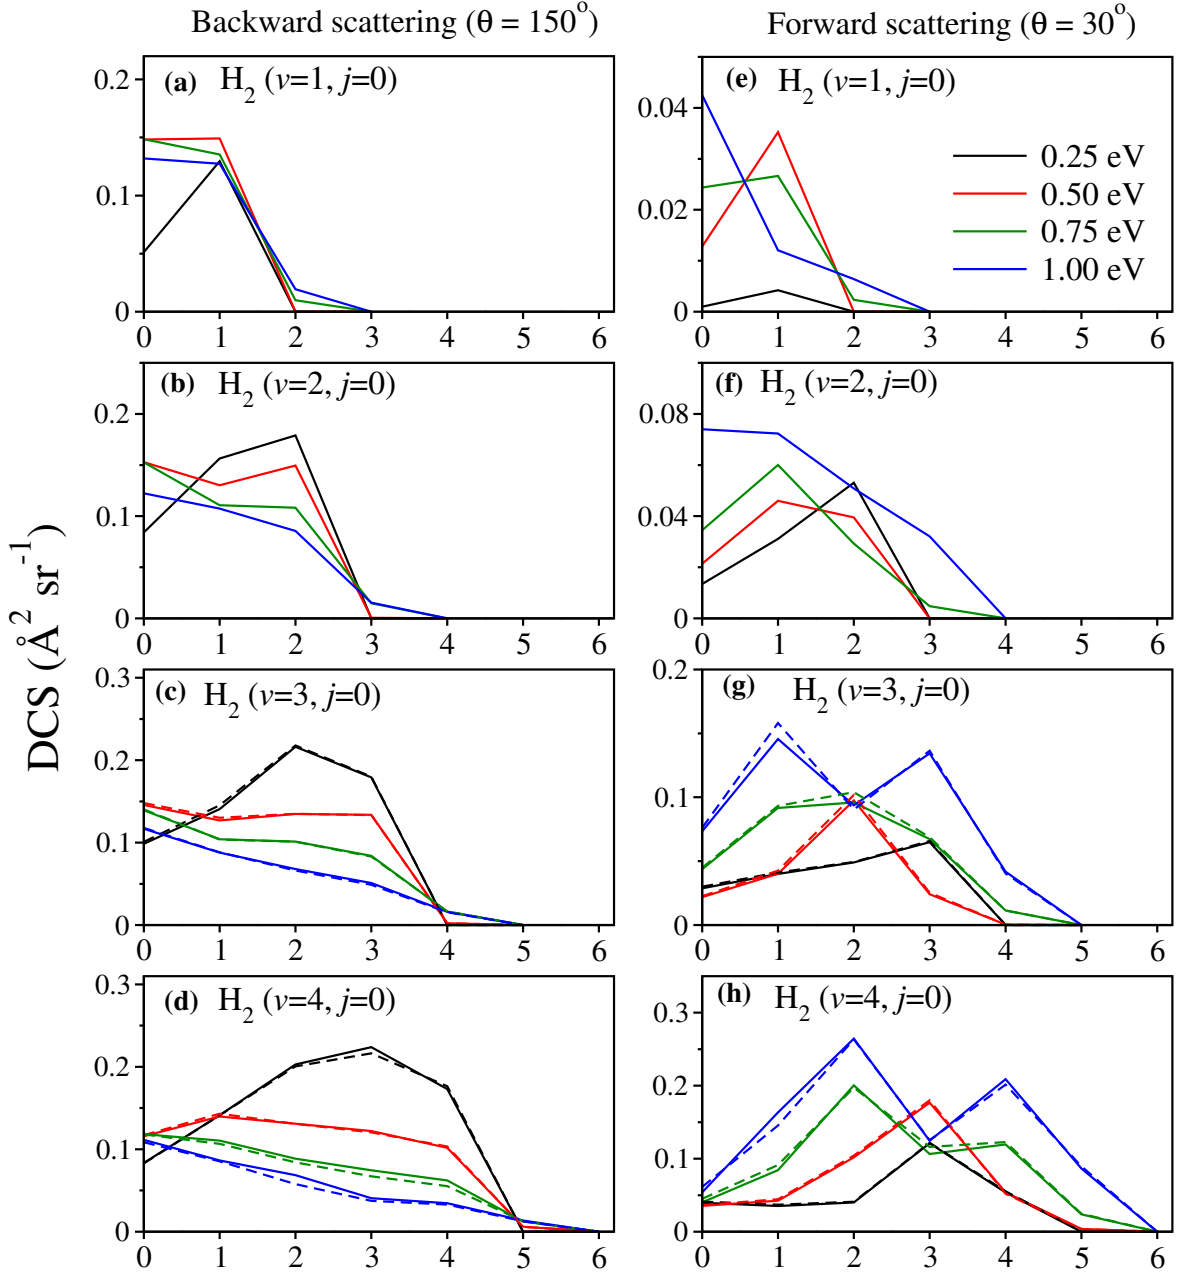

FIG. S7. Product vibrational level distributions in terms of DCS at  $\theta = 150^\circ$  (panels a-d) and  $30^\circ$  (panels e-h) for the  $\text{H} + \text{H}_2 (v=1-4, j=0) \rightarrow \text{H}_2 (v', \sum j', \sum \Omega') + \text{H}$  reaction at  $E_{\text{col}} = 0.25, 0.50, 0.75$  and  $1.0$  eV shown by lines of different colours. The coupled and uncoupled surface results for reagent  $\text{H}_2 (v=3-4, j=0)$  (panels c, d, g and h) are shown by solid and dashed lines, respectively, whereas the uncoupled surface results for reagent  $\text{H}_2 (v=1-2, j=0)$  (panels a, b, e and f) are shown by solid lines.



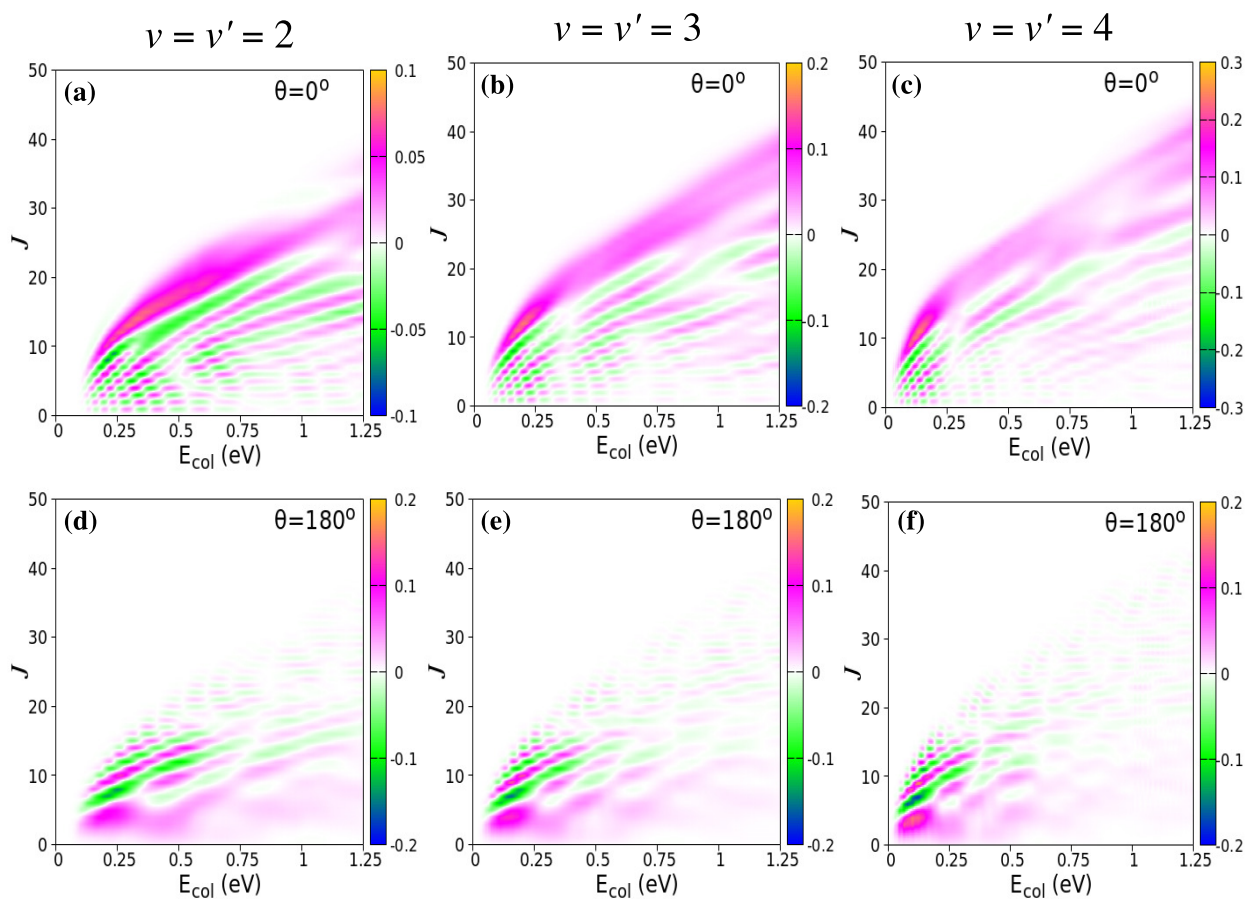

FIG. S8. Product vibrational level resolved (summed over  $j'$ )  $J$ -dependent partial DCSs ( $\text{\AA}^2 \text{sr}^{-1}$ ) of the  $\text{H} + \text{H}_2$  ( $v=2-4$ ,  $j=0$ )  $\rightarrow \text{H}_2$  ( $v'=v$ ) +  $\text{H}$  reaction shown as a function of  $E_{\text{col}}$  (abscissa) and  $J$  (ordinate) at  $\theta = 0^\circ$  (panels a-c) and  $180^\circ$  (panels d-f) corresponding to forward and backward scattering, respectively. The partial DCSs for reagent  $\text{H}_2$  ( $v=2$ ,  $j=0$ ) are obtained from uncoupled surface calculations and those for  $\text{H}_2$  ( $v=3-4$ ,  $j=0$ ) are obtained from coupled surface calculations.

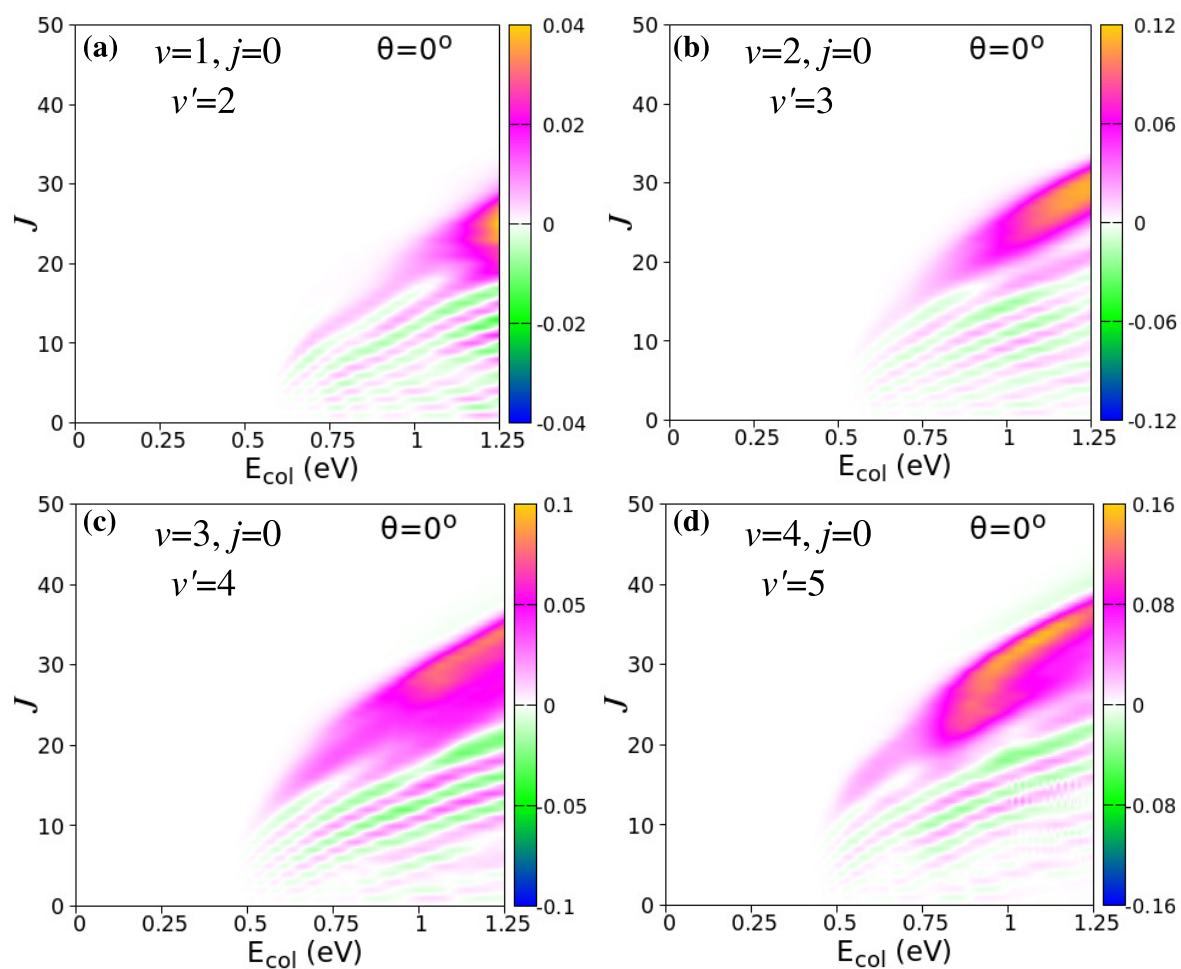

FIG. S9. Same as in Fig. S8, but for the  $\text{H} + \text{H}_2 (\nu=1-4, j=0) \rightarrow \text{H}_2 (\nu' = \nu+1) + \text{H}$  reaction at  $\theta = 0^\circ$  corresponding to the forward scattering.

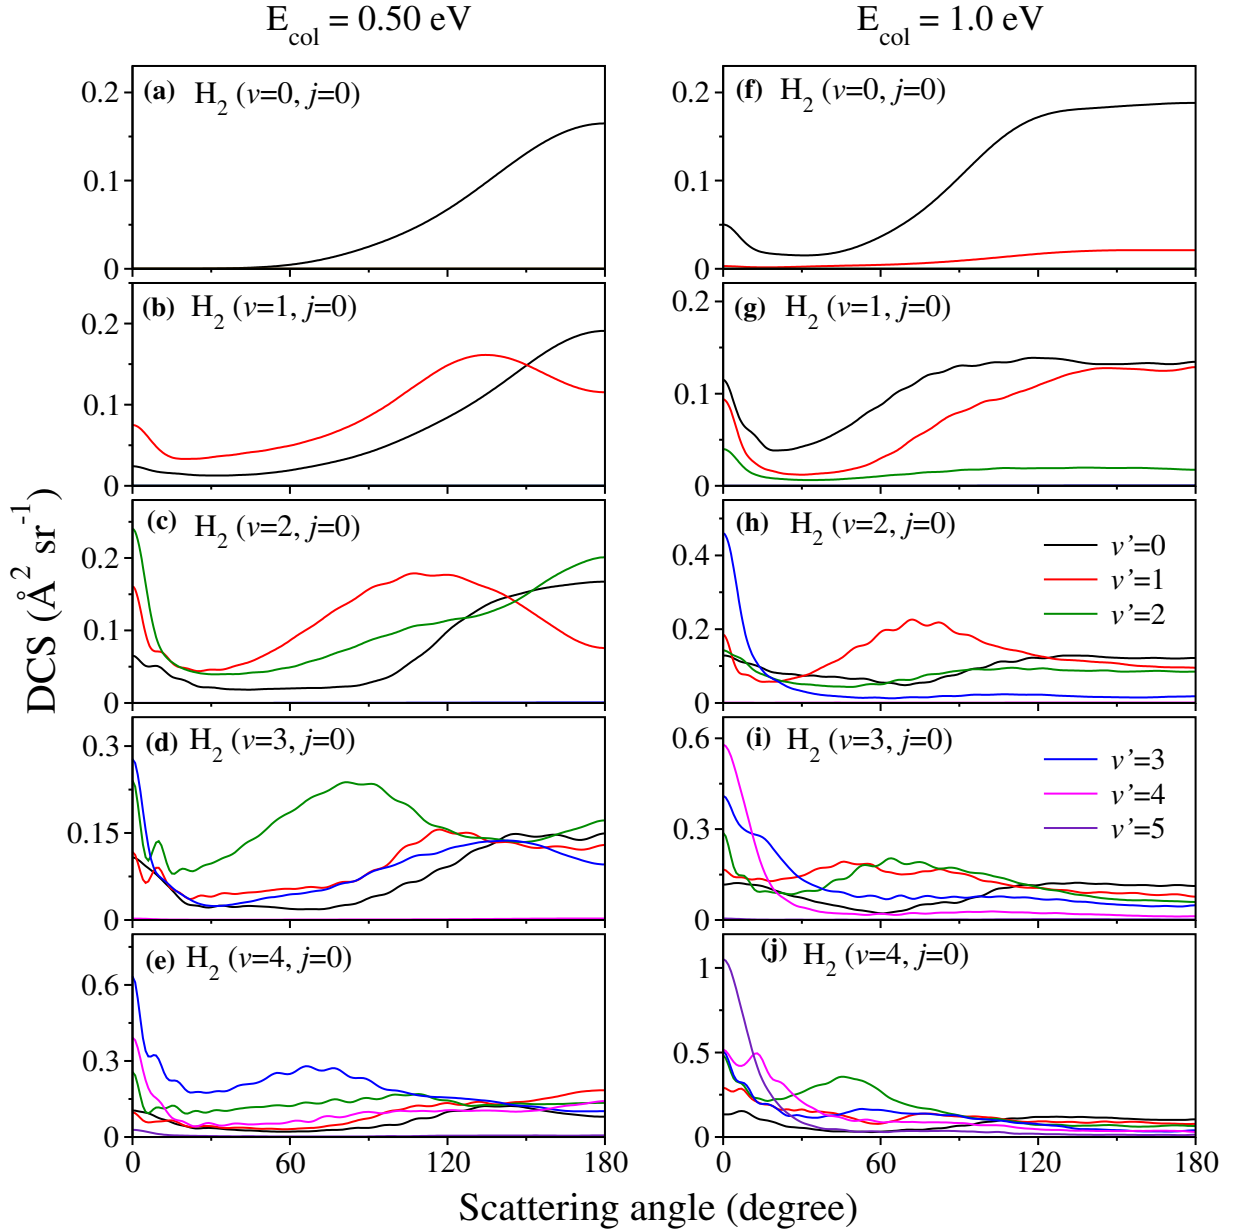

FIG. S10. Product vibrational level resolved DCSs for the  $\text{H} + \text{H}_2 (v=0-4, j=0) \rightarrow \text{H}_2 (v', \sum j', \sum \Omega') + \text{H}$  reaction as a function of center-of-mass scattering angle ( $\theta$ ) at  $E_{\text{col}} = 0.50$  and  $1.25 \text{ eV}$  shown by lines of different colours as indicated. The DCSs for reagent  $\text{H}_2 (v=0-2, j=0)$  (panels a-c and f-h) are obtained from uncoupled surface calculations and those for  $\text{H}_2 (v=3-4, j=0)$  (panels d, e, i and j) are obtained from coupled surface calculations.

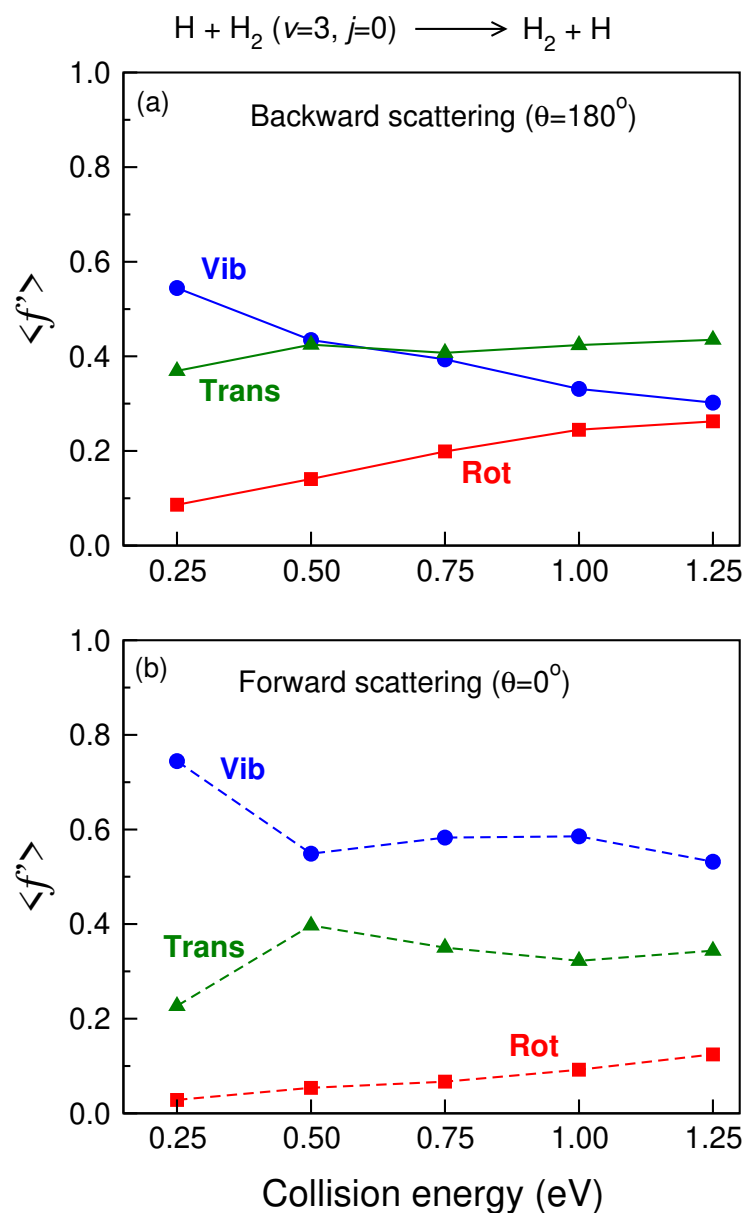

FIG. S11. Average fractions of the total available energy entering into product vibration, rotation and relative translation for the products scattered at  $\theta = 180^\circ$  (solid line) and  $\theta = 0^\circ$  (dashed line) for the  $\text{H} + \text{H}_2 (v=3, j=0) \rightarrow \text{H}_2 + \text{H}$  reaction as a function of collision energy. The  $\langle f' \rangle$  values are shown by lines of different colours and symbols. The abbreviations Vib, Rot and Trans represent product vibration, rotation and relative translation, respectively.

$$E_{\text{col}} = 1.25 \text{ eV}$$

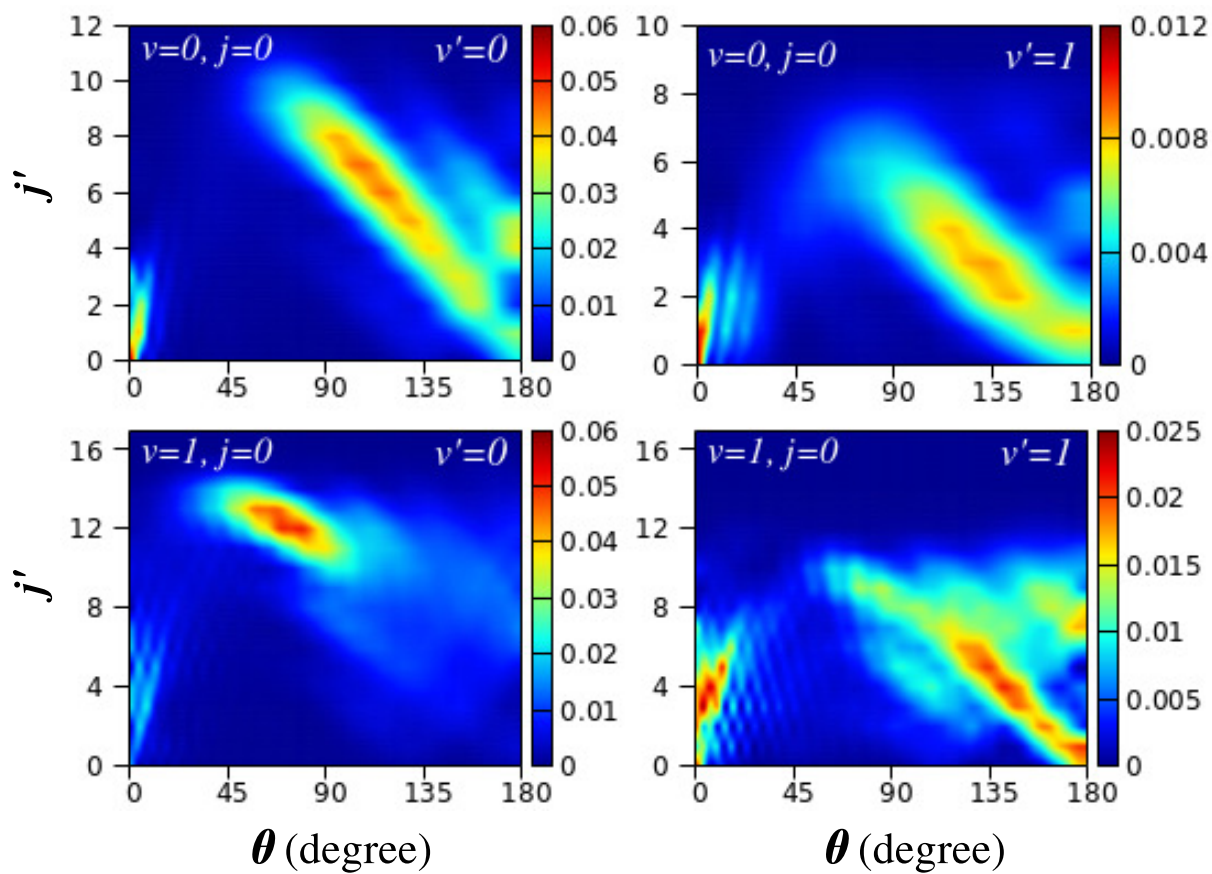

FIG. S12. Product rotational level resolved state-to-state DCSs of the  $\text{H} + \text{H}_2 (v=0-1, j=0) \rightarrow \text{H}_2 (v'=0-1, j') + \text{H}$  reaction as a function of  $\theta$  (abscissa) and  $j'$  (ordinate) at  $E_{\text{col}} = 1.25 \text{ eV}$ .

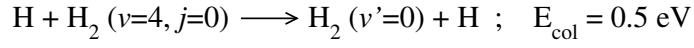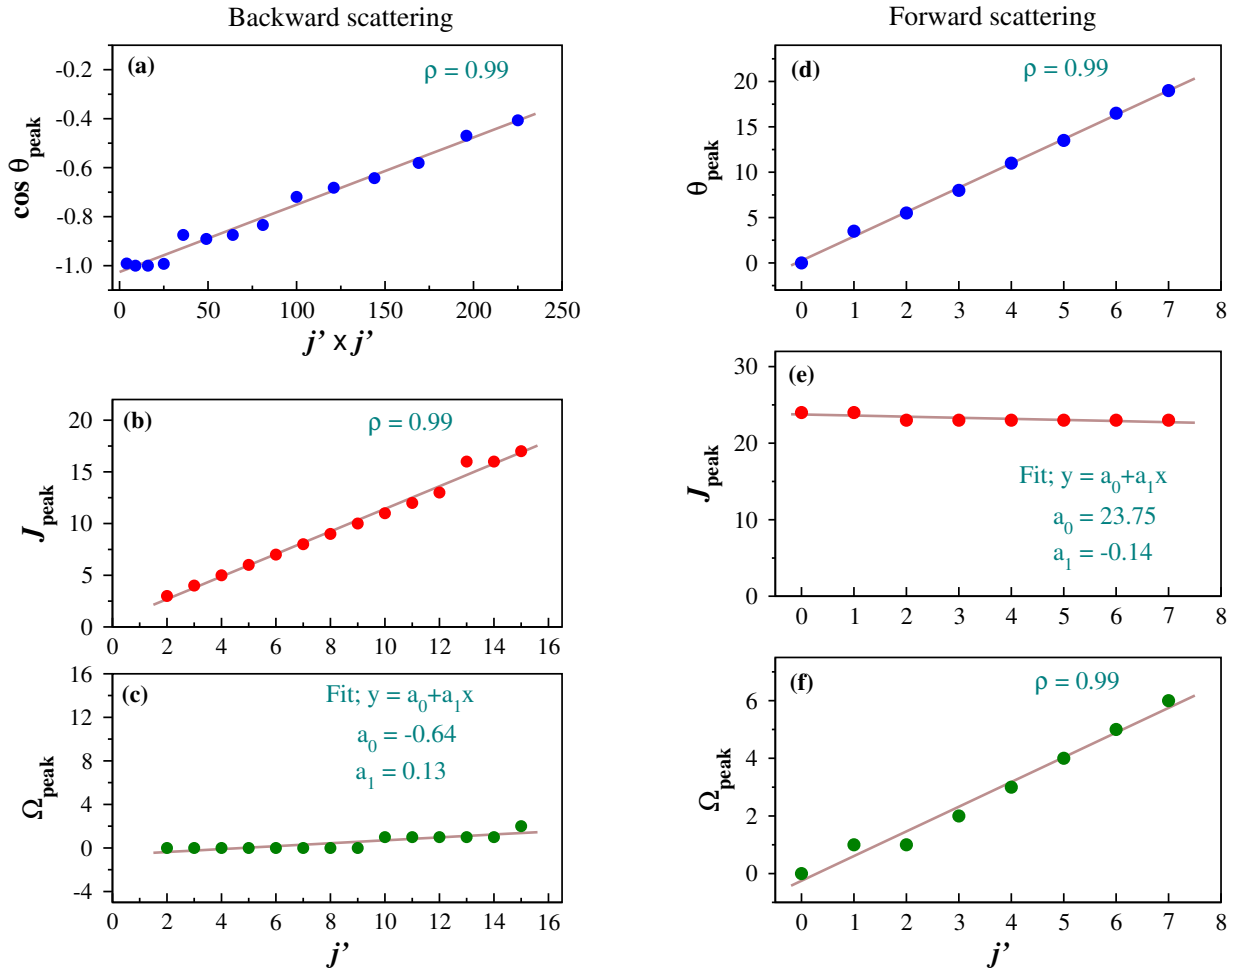

FIG. S13. Correlation among  $\theta_{\text{peak}}$ ,  $\cos \theta_{\text{peak}}$ ,  $J_{\text{peak}}$ ,  $\Omega'_{\text{peak}}$  and  $j'$  both in the backward [(a)-(c)] and forward [(d)-(f)] scattering of the  $\text{H} + \text{H}_2 (v=4, j=0) \rightarrow \text{H}_2 (v'=0, j') + \text{H}$  reaction at  $E_{\text{col}} = 0.5 \text{ eV}$ . The solid lines are least-squares fit to the corresponding data by a linear equation of the type  $y = a_0 + a_1 x$ . The Pearson correlation coefficients ( $\rho$ ) are mentioned inside corresponding panels to show the quality of the fit.

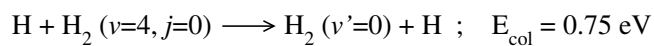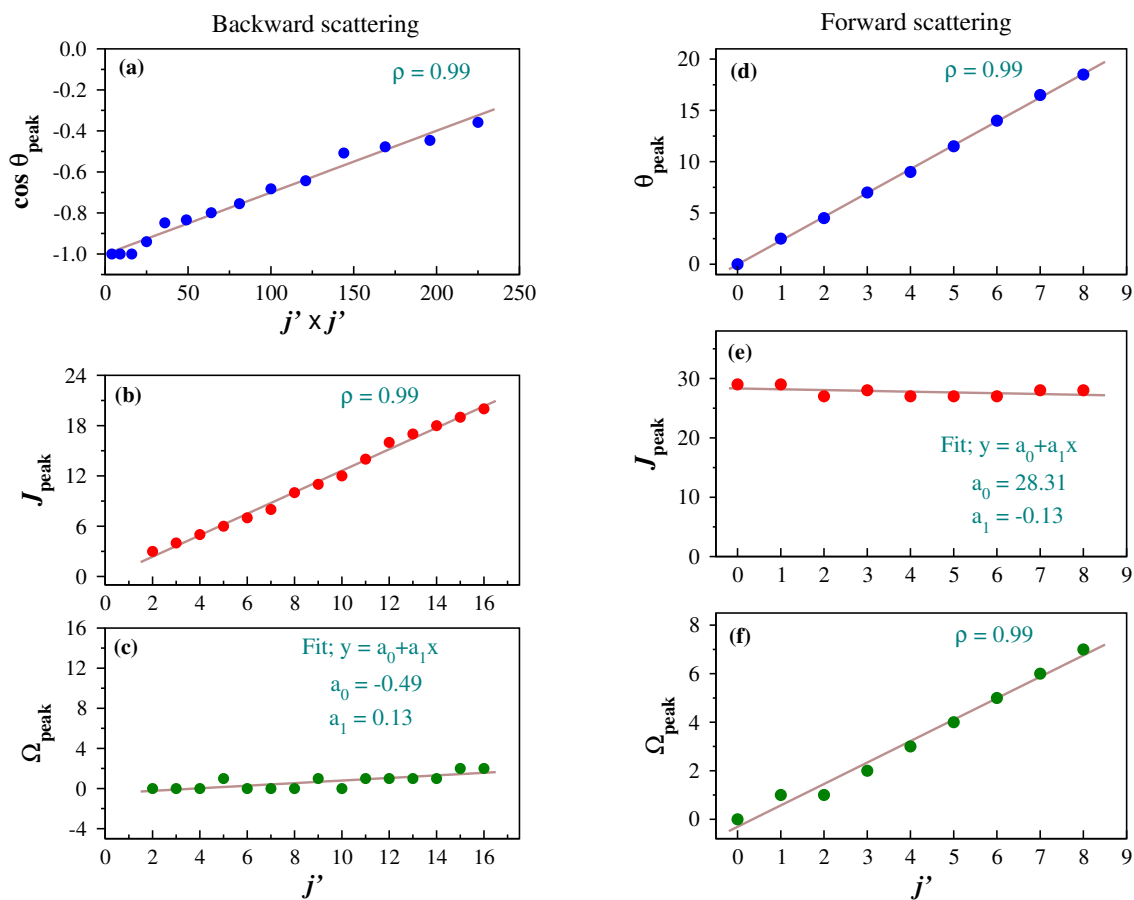

FIG. S14. Same as in Fig. S13, but at  $E_{\text{col}} = 0.75 \text{ eV}$ .

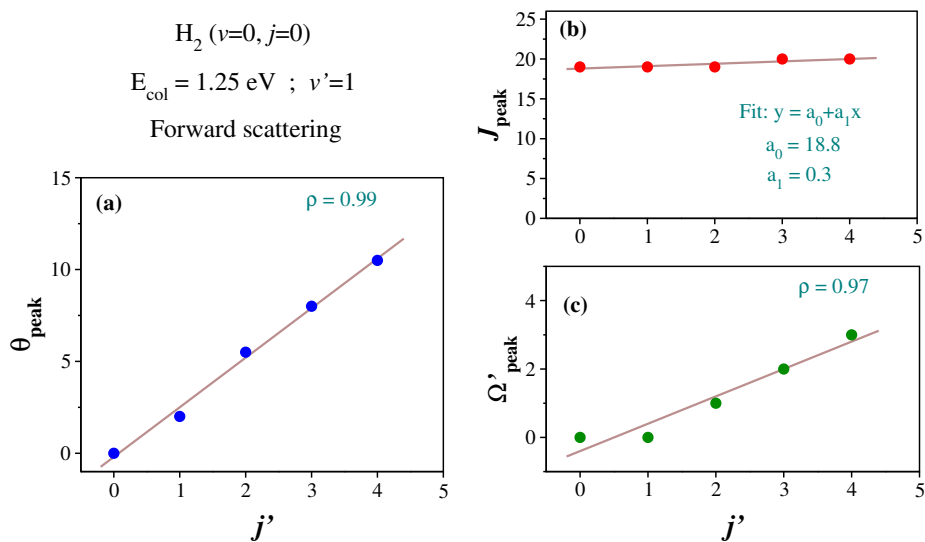

FIG. S15. Same as in Fig. S13, but for the  $\text{H} + \text{H}_2 (v=0, j=0) \rightarrow \text{H}_2 (v'=1, j') + \text{H}$  reaction at  $E_{\text{col}} = 1.25 \text{ eV}$ .

## REFERENCES

- <sup>1</sup>M. Hankel, S. C. Smith, R. J. Allan, S. K. Gray and G. G. Balint-Kurti, *J. Chem. Phys.*, 2006, **125**, 164303.
- <sup>2</sup>S. C. Althorpe, *J. Chem. Phys.*, 2001, **114**, 1601–1616.
- <sup>3</sup>T.-S. Chu, K.-L. Han, M. Hankel, G. G. Balint-Kurti, A. Kuppermann and R. Abrol, *J. Chem. Phys.*, 2009, **130**, 144301.
- <sup>4</sup>S. Y. Lin and H. Guo, *Phys. Rev. A*, 2006, **74**, 022703.
